# Supplementary material for: Pharmacokinetics, absorption, distribution, metabolism and excretion of the MEK inhibitor zapnometinib in rats
Source: PubMed Central journal article supplement (PMC9760738; doi:10.3389/fphar.2022.1050193), 2022-12-05
Supplement: DataSheet1.pdf [file DataSheet1.pdf]

**Supplementary for:**

**Pharmacokinetics, Absorption, Distribution, Metabolism and Excretion of the MEK  
Inhibitor Zapnometinib in Rats**

**Yvonne Füll, Christian Wallasch, Ashley Hilton and Oliver Planz**

Supplementary Methods

Supplementary Figures S1 - S6

Supplementary Tables S1 - S10

## Supplementary methods:

### Sample preparation

For HPLC analysis, a portion of each plasma sample (ca 2 mL; 1 volume) was extracted with a single aliquot (3 volumes) of acetonitrile/methanol 4:1 (v/v). After addition of solvent, the samples were vortex mixed (ca 1 minute), sonicated (ca 10 minutes), then centrifuged ( $2000 \times g$  for 10 minutes at  $4^{\circ}\text{C}$ ) and the supernatant transferred to a clean tube. The resulting residue was extracted a further two times with the following solvents following the same procedure: Extract 2 – Acetonitrile/Methanol 4:1 (v/v); Extract 3 – Acetonitrile/Methanol 1:1 (v/v).

Each extract was weighed and duplicate weighed aliquots (0.1 mL) taken for measurement of radioactivity in order to calculate the extraction efficiency. The extracts were combined and concentrated under a constant stream of nitrogen gas to near dryness and reconstituted in acetonitrile/0.1% aqueous formic acid, 1:1 (v/v) by vortex mixing, sonication and centrifugation at  $10000 \times g$  for 5 min at  $4^{\circ}\text{C}$ . The concentrates were weighed, and duplicate weighed aliquots (0.025 – 0.05 mL) taken for measurement of radioactivity to calculate recovery following concentration. An aliquot of each concentrated extract was injected into the HPLC.

A portion of each pooled urine sample was centrifuged at  $10000 \times g$  for 5 minutes at  $4^{\circ}\text{C}$  to remove any particulate material and then injected directly into the HPLC. Feces homogenate samples were allowed to thaw and the total remaining sample was transferred to pre-weighed plastic centrifuge pots. After measurement of total sample weight, each sample was mixed with acetonitrile/methanol 4:1 (v/v) (nominally  $3 \times$  sample weight) using a sample shaker (ca 1 minute). Following sonication (ca 10 minutes) and centrifugation ( $2000 \times g$  for 10 minutes), the supernatant was decanted and weighed. The resulting residue was extracted a further two

times with the following solvents following the same procedure: Extract 2 – Acetonitrile/methanol 4:1 (v/v); Extract 3 – Acetonitrile/Water 1:1 (v/v). Duplicate weighed aliquots of each supernatant (ca 0.1 mL) were mixed directly with Ultima Gold scintillation cocktail for measurement of radioactivity concentrations. The extracted residue was allowed to air dry and the total weight was recorded. Duplicate weighed portions (ca 0.05g) were taken for radioassay after oxidation. The extracts were combined and concentrated under a constant stream of nitrogen gas to near dryness and reconstituted in acetonitrile/0.1% aqueous formic acid, 1:1 (v/v) by vortex mixing, sonication and centrifugation at  $10000 \times g$  for 5 min at 4°C. The concentrates were weighed, and duplicate weighed aliquots (0.025 – 0.05 mL) taken for measurement of radioactivity to calculate recovery following concentration. An aliquot of each concentrated extract was injected into the HPLC.

For Liquid scintillation analyses, carcasses from rats (Group 2) were solubilized by digestion at ca 55°C overnight in a solution prepared from sodium hydroxide (80 g) and Triton X-405 (100 mL) in purified water (600 mL) and methanol (300 mL). After measurement of total sample weight (as appropriate), replicate portions of diluted dose solutions (ca 0.1 mL), plasma (ca 0.05 – 0.25 mL), urine (ca 0.05 – 0.25 mL), expired air trap solution (ca 1 mL) and cage wash (ca 1 mL) were mixed directly with Ultima Gold scintillation cocktail (5 mL; 15 mL for air traps) for measurement of radioactivity concentrations. Similarly, replicate weighed portions of digested carcass solutions (ca 1 mL plus 1 mL purified water) were mixed with Ultima Gold (10 mL) scintillation cocktail for measurement of radioactivity concentrations. Feces were weighed, then homogenized to a smooth paste after the addition of an appropriate volume (approximately 1.5 volumes) of purified water and the weight of each homogenate was recorded. Replicate weighed portions of feces (ca 0.2 g) and blood cells (ca. 0.25 g) were placed on Combustocones, which were then capped with cellulose pads and burned in oxygen using

an Automatic Sample Oxidiser. The products of combustion were absorbed in Carbosorb E and mixed with Permafluor E+ for measurement of radioactivity concentrations.

# Supplementary Figures

2 hours

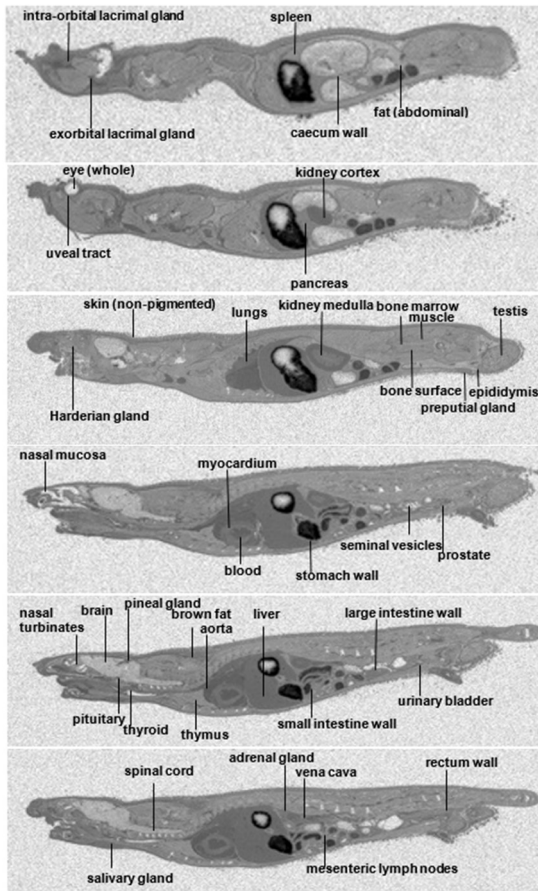

24 hours

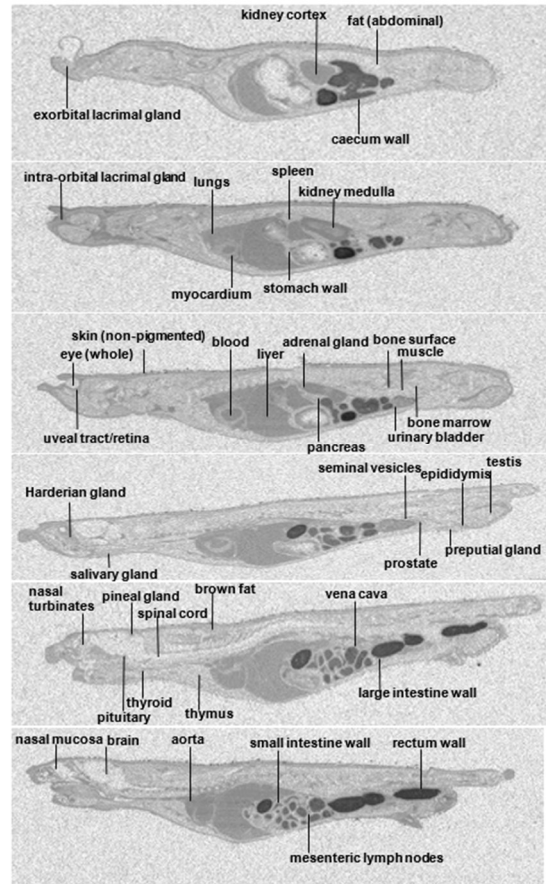

72 hours

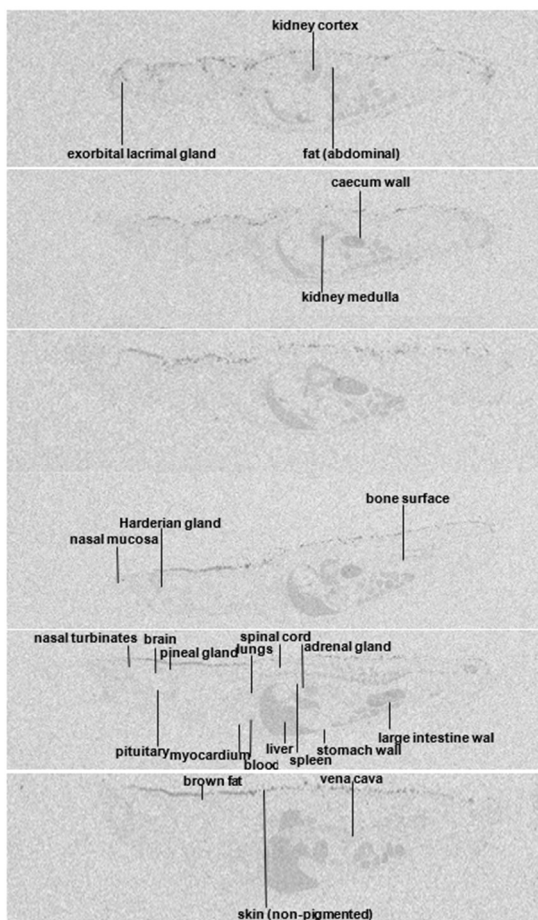

168 hours

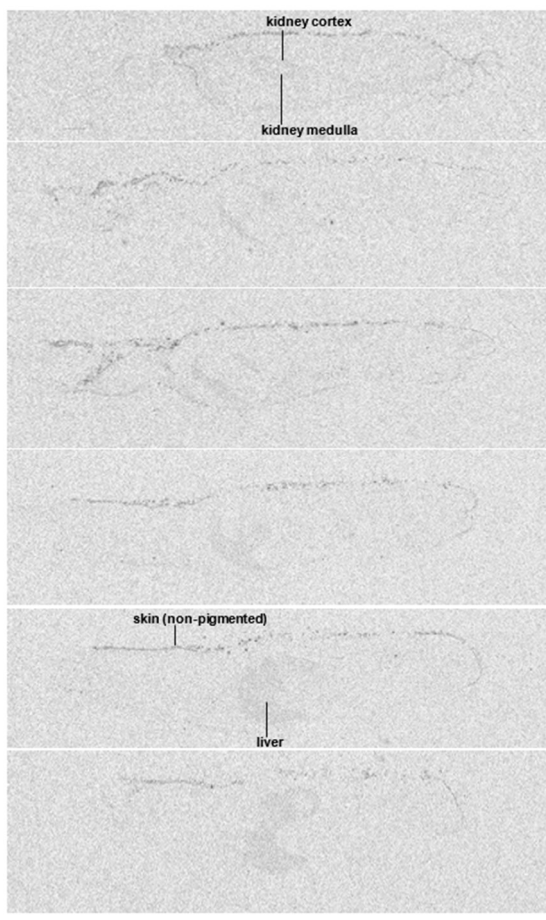

**Supplementary Figure S1:** Distribution of radioactivity at 2, 24, 72 and 168 hours following a single administration of  $^{14}\text{C}$ -zapnometinib (30 mg/kg) to male albino rats. Whole body autoradiogram for one representative animal is shown.

### 0.5 hours

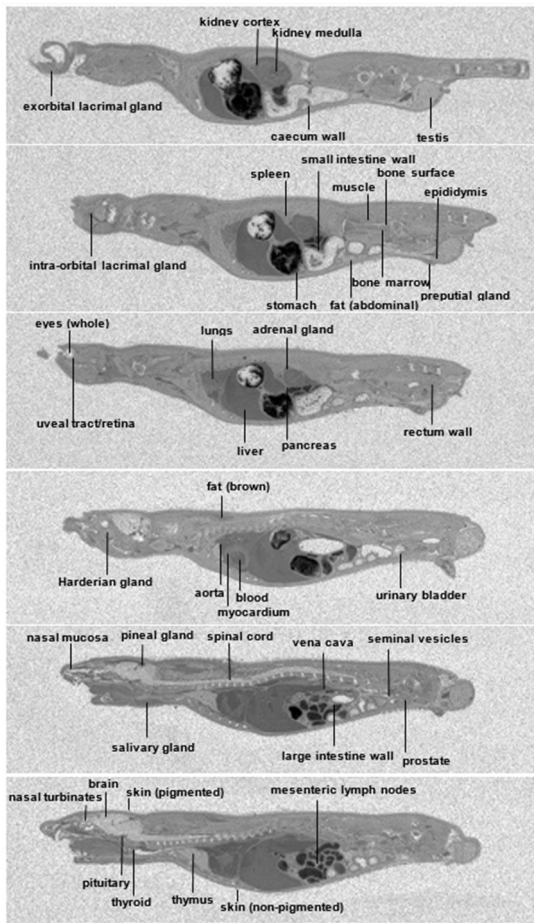

### 4 hours

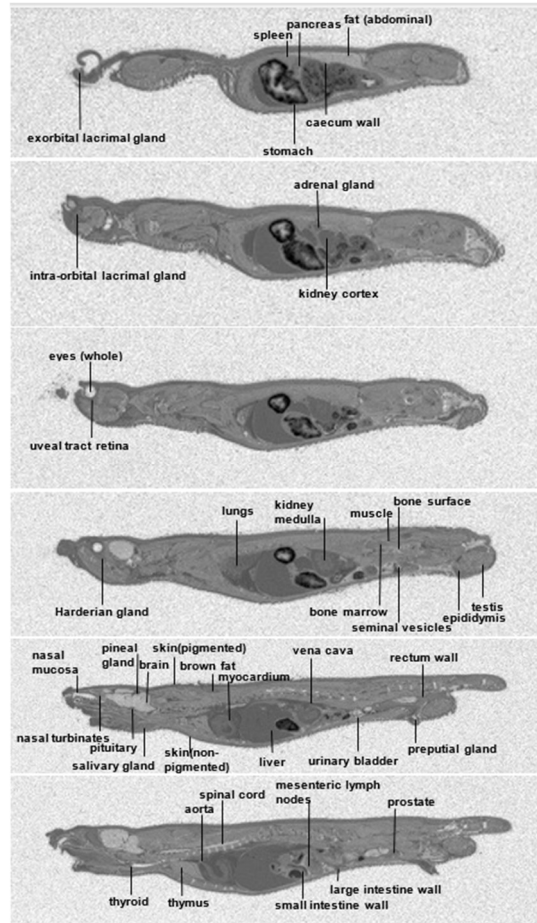

### 8 hours

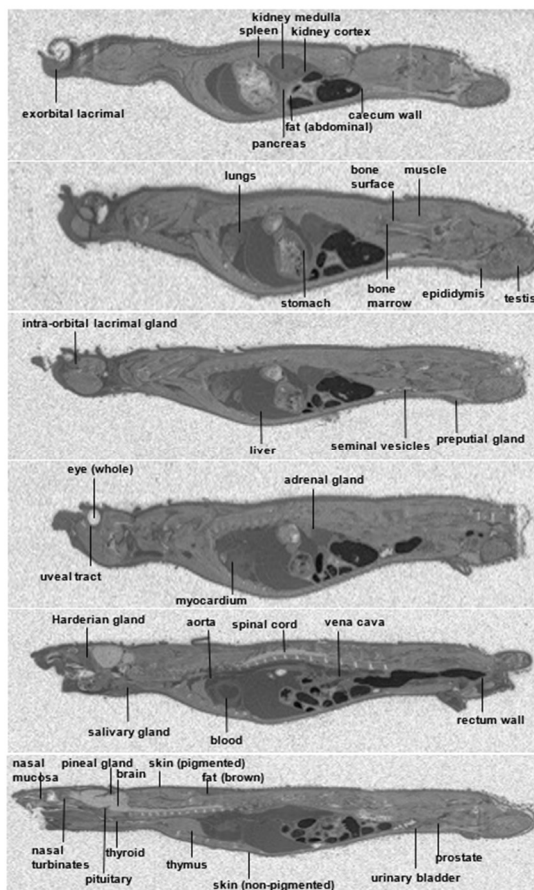

### 168 hours

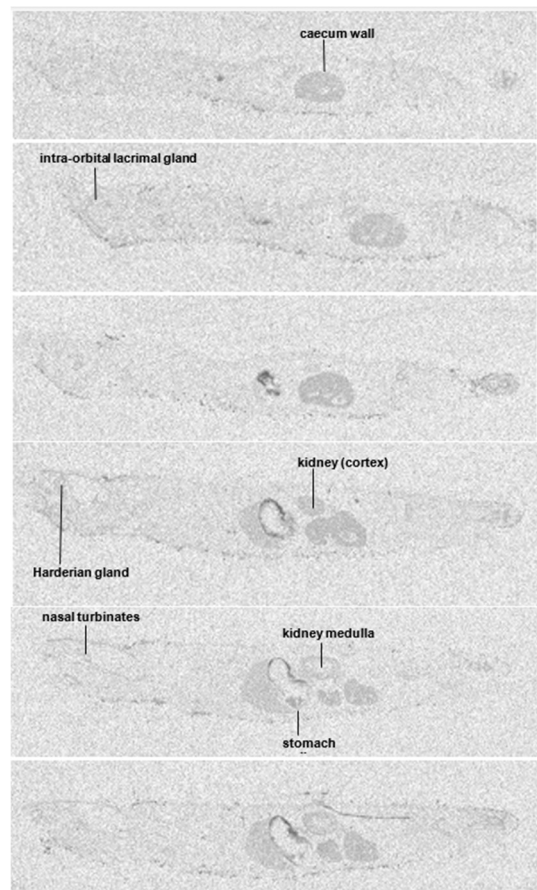

**Supplementary Figure S2:** Distribution of radioactivity at 0.5, 4, 8 and 168 hours following a single administration of <sup>14</sup>C-zapnometinib (30 mg/kg) to male partially pigmented rats. Whole body autoradiogram for one representative animal is shown.



### 0.5 hours

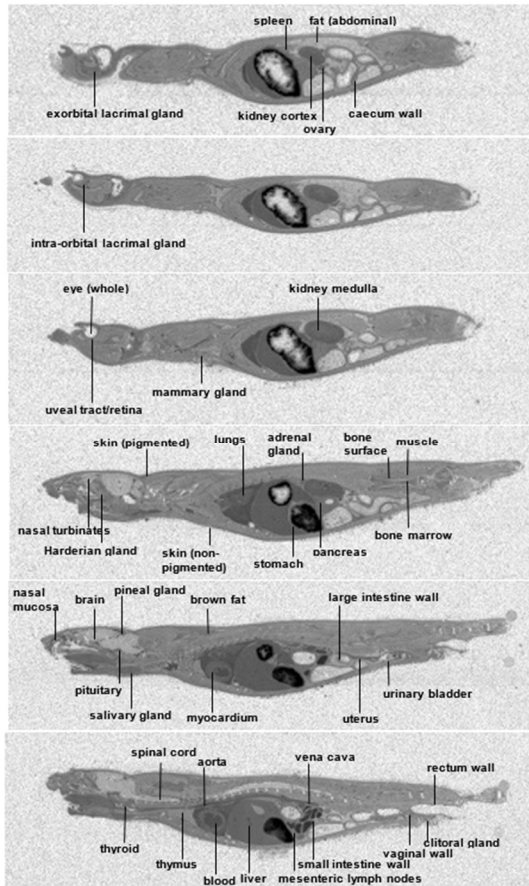

### 4 hours

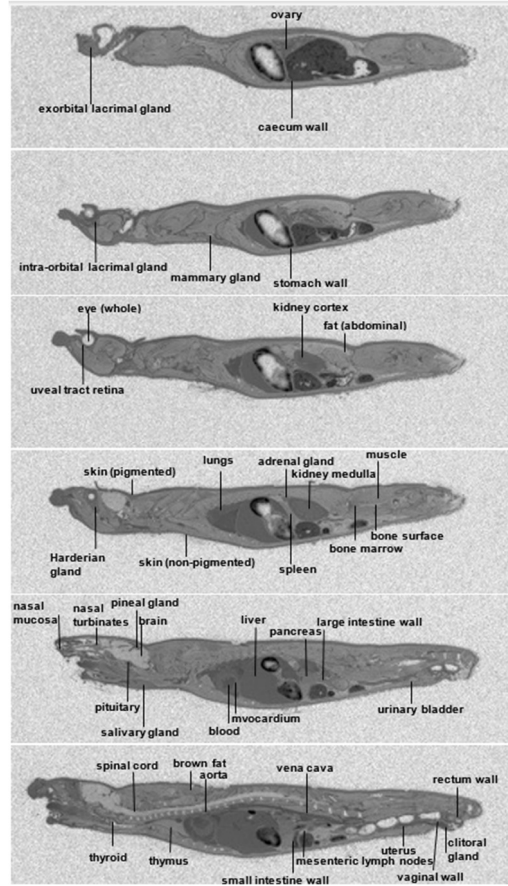

### 8 hours

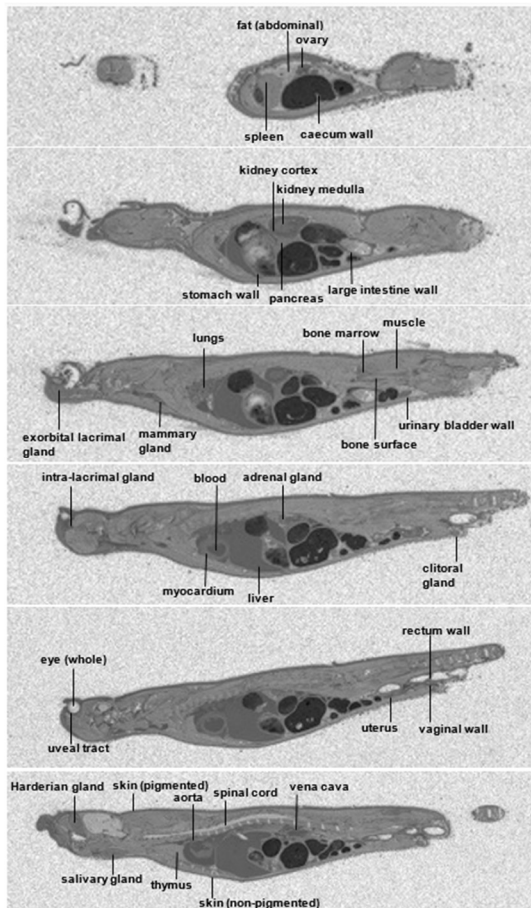

### 168 hours

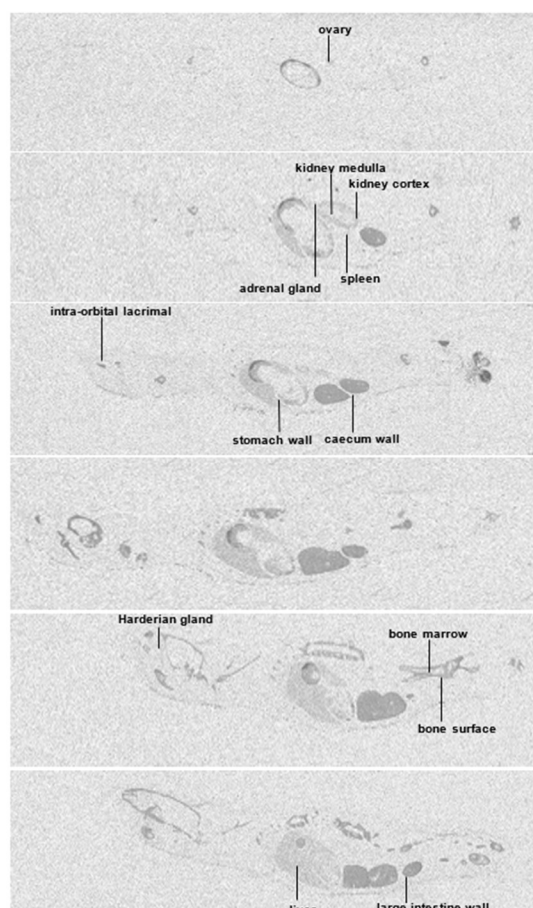

**Supplementary Figure S3:** Distribution of radioactivity at 0.5, 4, 8 and 168 hours following a single administration of  $^{14}\text{C}$ -zapnometinib (30 mg/kg) to female partially pigmented rats. Whole body autoradiogram for one representative animal is shown.

A

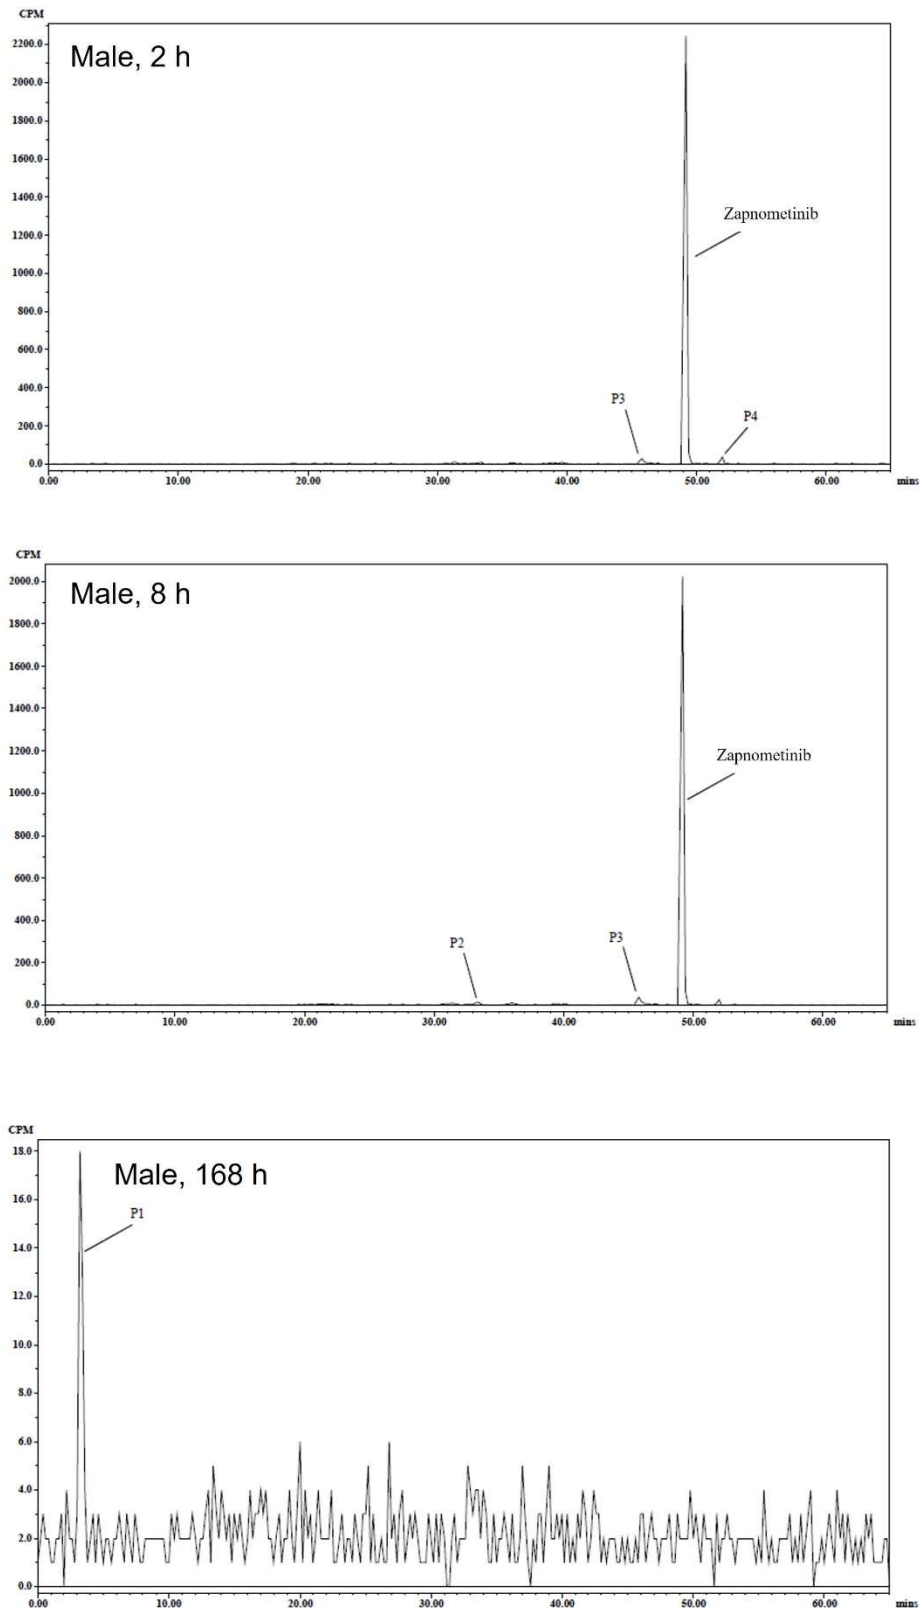

B

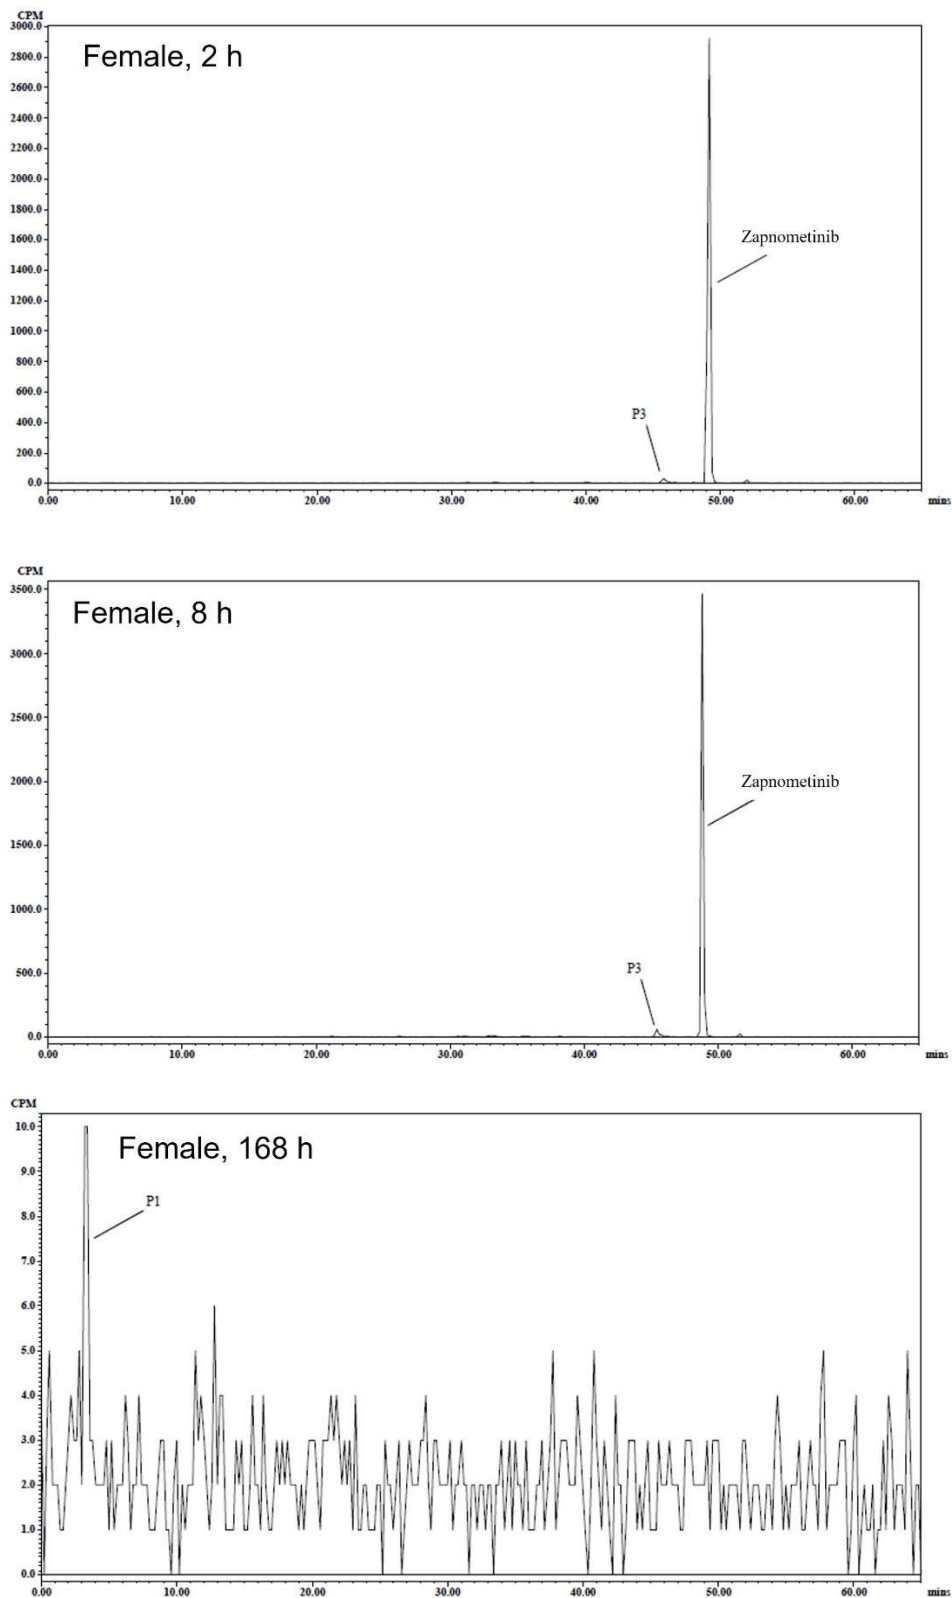

**Supplementary Figure S4:** Representative HPLC radiochromatograms of plasma extracts after 2, 8 and 168 hours following a single oral administration of [ $^{14}\text{C}$ ]-zapnometinib (30 mg/kg) to male (A) and female (B) rats (Group 2).

A

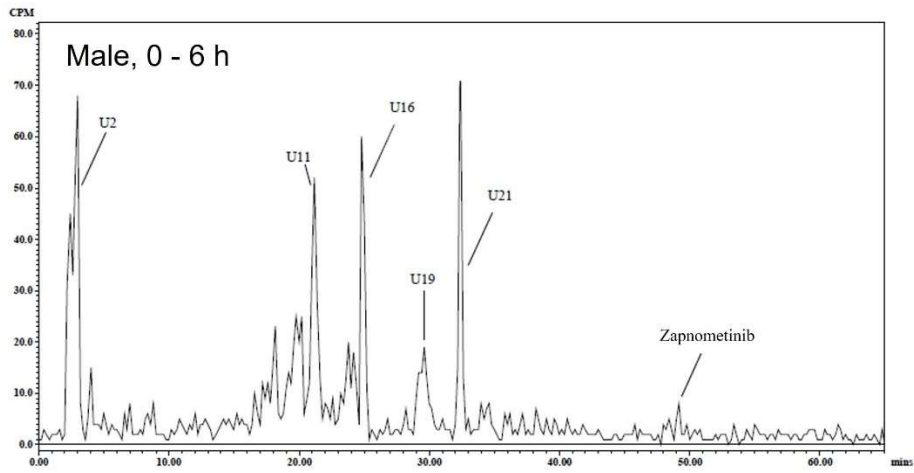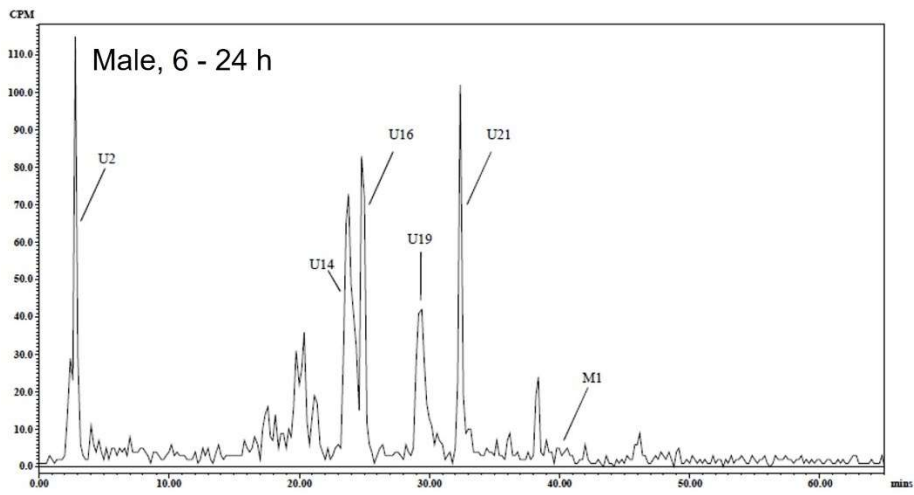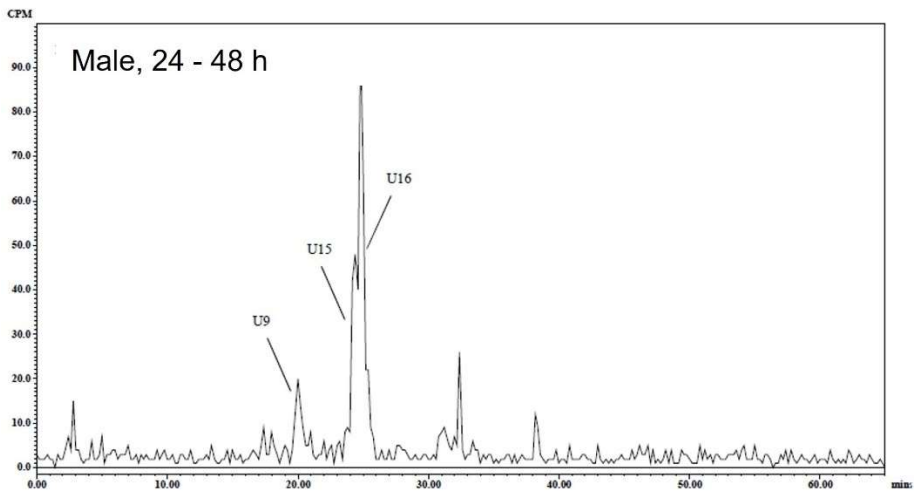

**B**

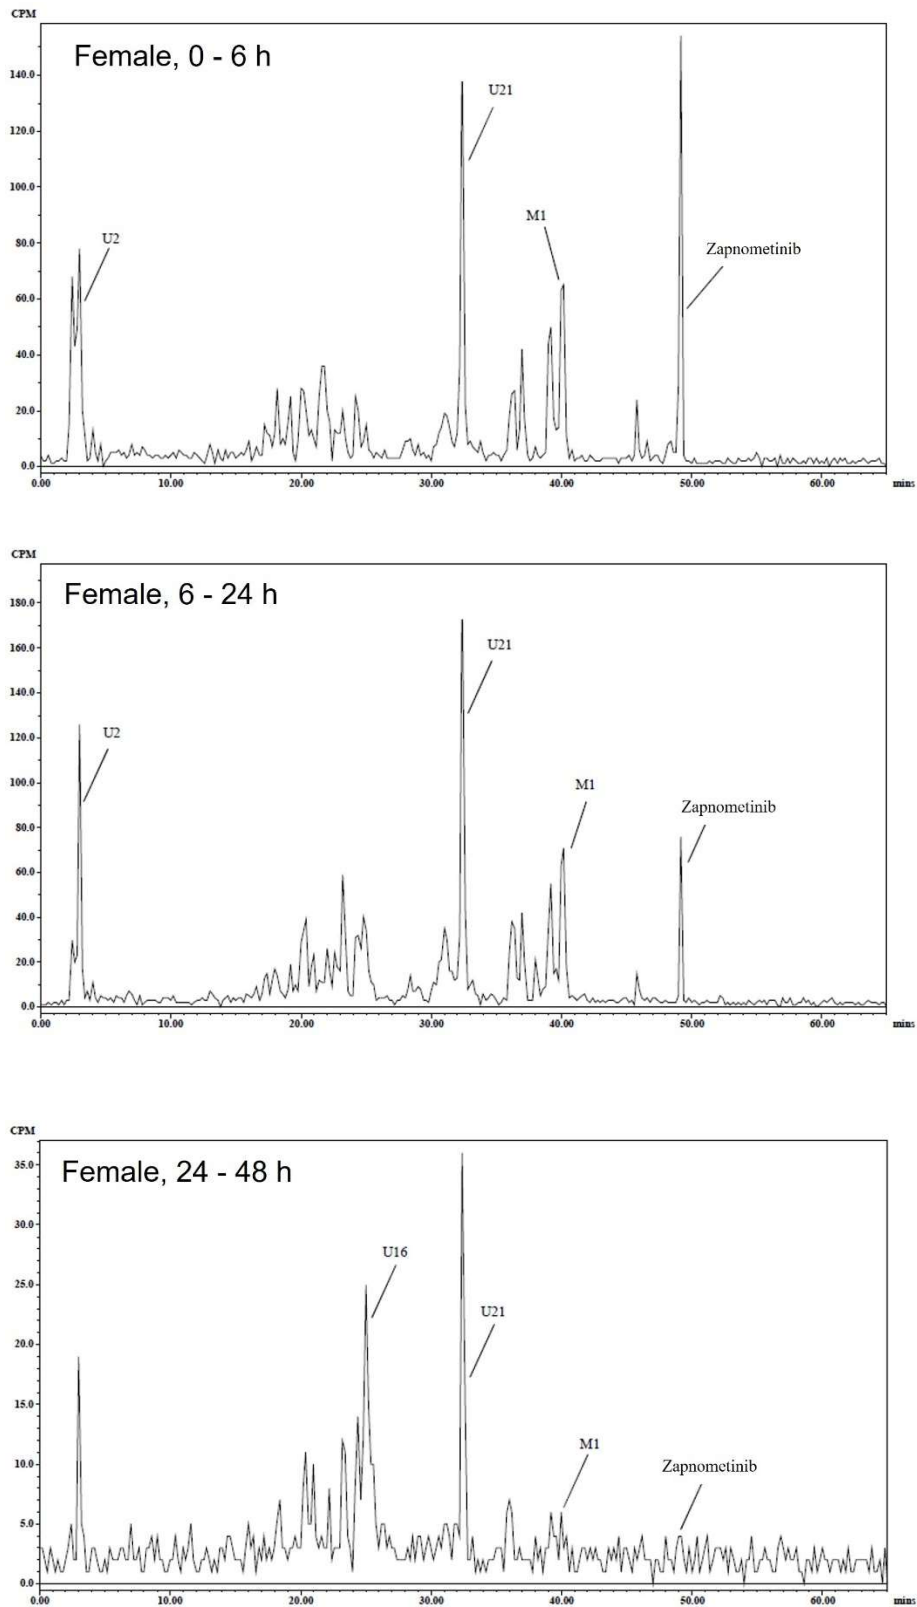

**Supplementary Figure S5:** Representative HPLC radiochromatograms of pooled urine from 0-6, 6 - 24 and 24 - 48 hours following a single oral administration of [ $^{14}\text{C}$ ]-zapnometinib (30 mg/kg) to male (A) and female (B) rats (Group 2).

Synergi Polar-RP 250\*4.6mm, 4um; C18 Guard col; 0.1%v/v formic acid in water/0.1% v/v formic acid in acetonitrile  
8455839-02 #13469-13553 RT: 47.27-47.52 AV: 10 SB: 65 46.21-46.96 , 47.77-48.82 NL: 1.60E8  
T: FTMS - p ESI Full ms [105.0000-900.0000]

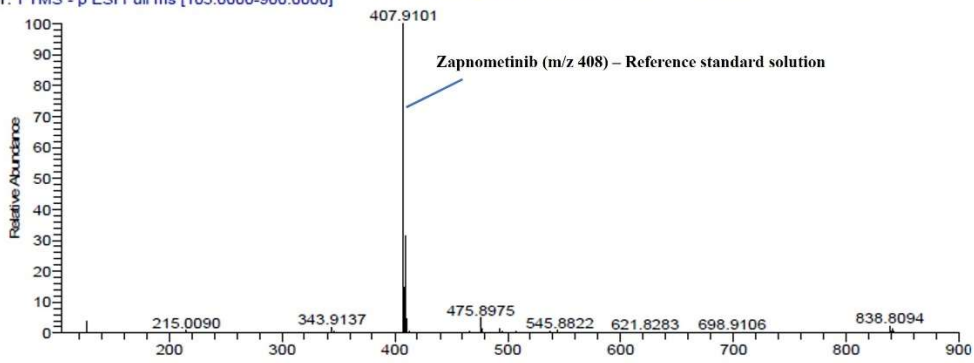

Synergi Polar-RP 250\*4.6mm, 4um; C18 Guard col; 0.1%v/v formic acid in water/0.1% v/v formic acid in acetonitrile  
8455839-04 #11062-11206 RT: 38.52-38.98 AV: 18 SB: 210 30.87-34.05 , 42.35-45.03 NL: 2.69E8  
T: FTMS - p ESI Full ms [105.0000-900.0000]

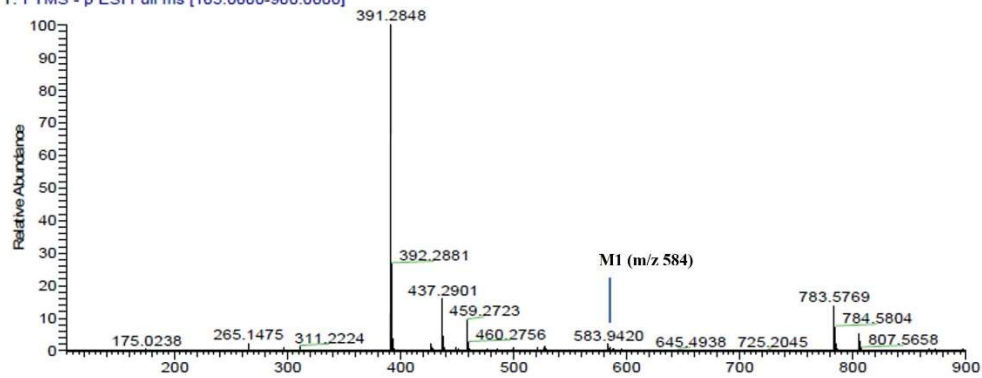

Synergi Polar-RP 250\*4.6mm, 4um; C18 Guard col; 0.1%v/v formic acid in water/0.1% v/v formic acid in acetonitrile  
8455839-04 #12739-12873 RT: 44.38-44.78 AV: 16 SB: 86 42.81-44.03 , 45.26-46.39 NL: 2.22E8  
T: FTMS - p ESI Full ms [105.0000-900.0000]

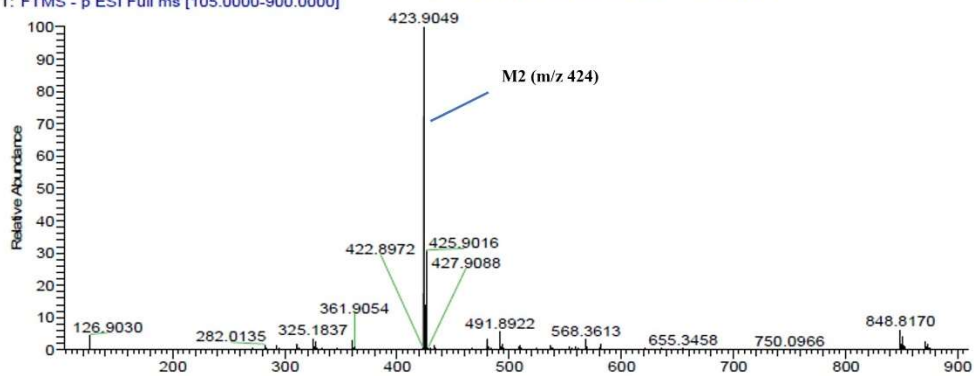

Synergi Polar-RP 250\*4.6mm, 4um; C18 Guard col; 0.1%v/v formic acid in water/0.1% v/v formic acid in acetonitrile  
8455839-04 #13473-13538 RT: 46.86-47.08 AV: 9 SB: 85 47.39-48.30 , 45.12-46.53 NL: 1.89E7  
T: FTMS - p ESI Full ms [105.0000-900.0000]

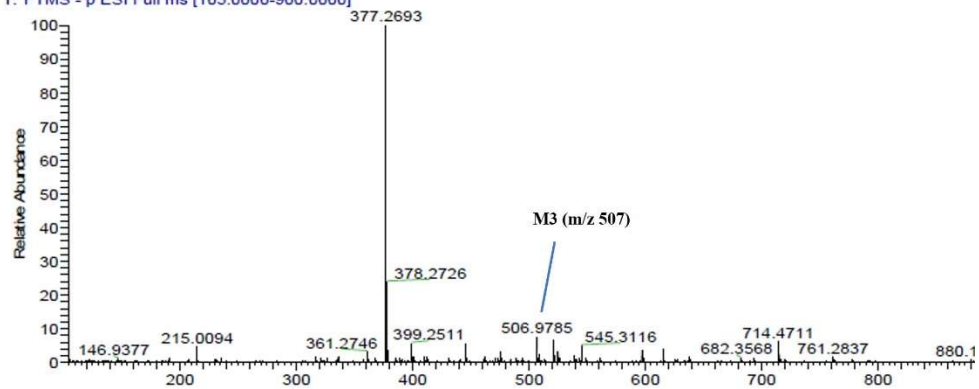

Synergi Polar-RP 250\*4.6mm, 4um; C18 Guard col: 0.1%v/v formic acid in water/0.1% v/v formic acid in acetonitrile  
8455839-04 #13543-13721 RT: 47.11-47.70 AV: 22 SB: 106 45.63-47.01, 48.15-49.67 NL: 1.65E8  
T: FTMS - p ESI Full ms [105.0000-900.0000]

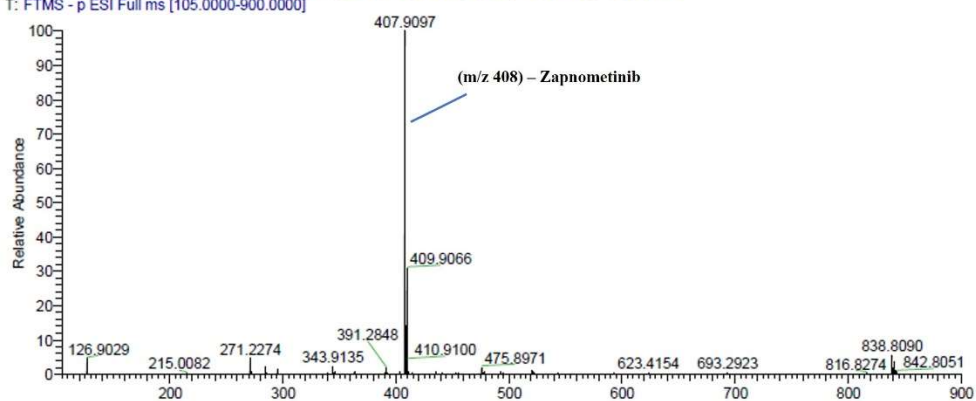

Synergi Polar-RP 250\*4.6mm, 4um; C18 Guard col: 0.1%v/v formic acid in water/0.1% v/v formic acid in acetonitrile  
8455839-12 #5267-5342 RT: 18.40-18.63 AV: 9 SB: 46 19.00-19.54, 17.30-18.05 NL: 3.00E6  
T: FTMS - p ESI Full ms [105.0000-1350.0000]

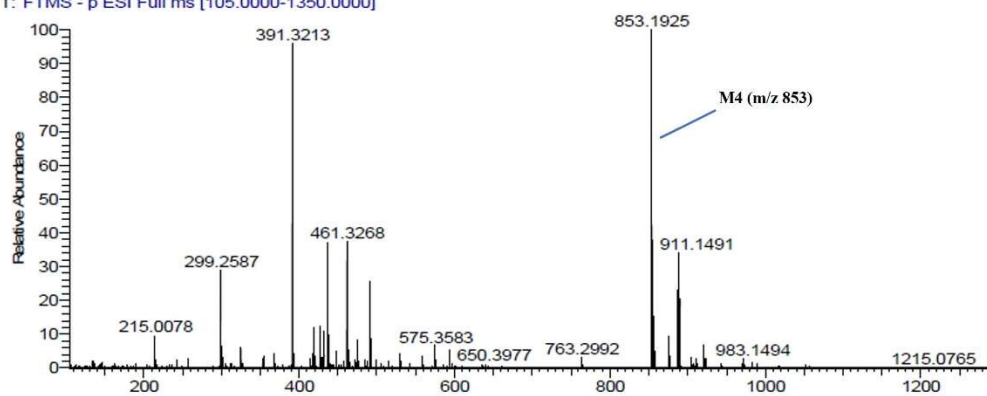



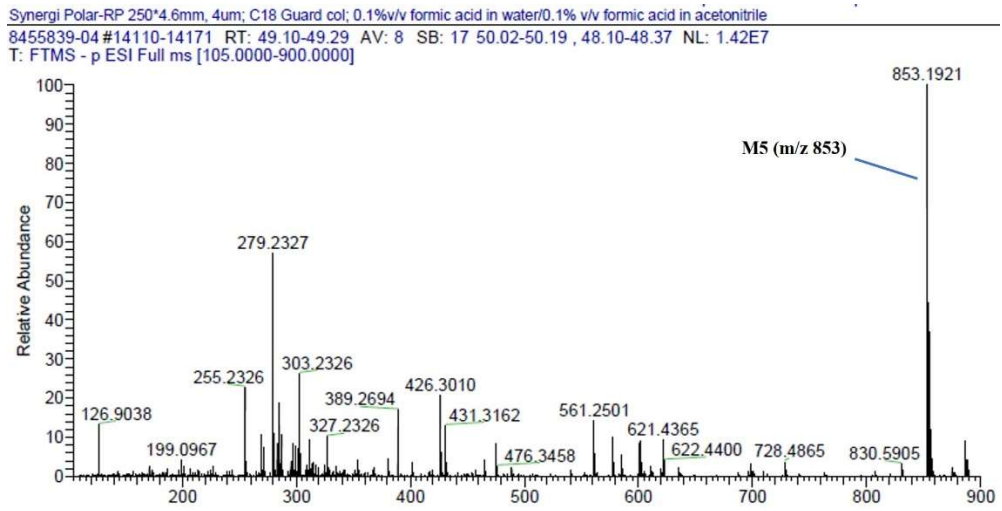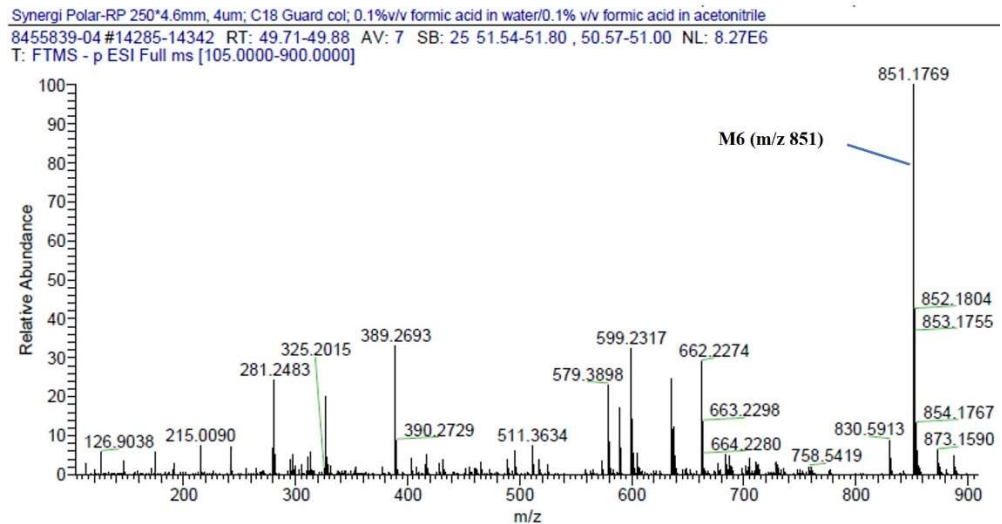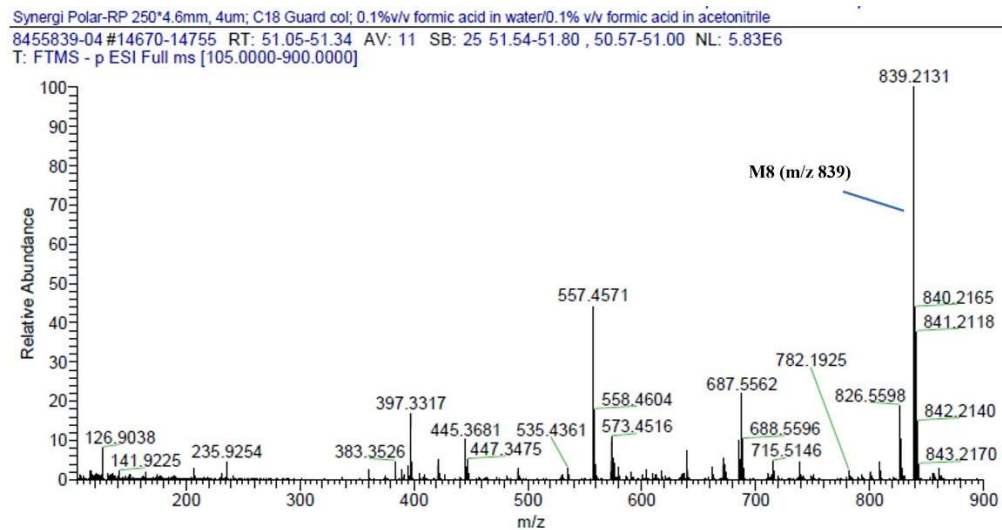

**Supplementary Figure S6:** Representative mass spectra from the LC-MS analyses in metabolite identification



## Supplementary Tables

**Supplementary Table S1:** Pharmacokinetic parameters derived from total radioactivity in plasma following a single oral administration of [<sup>14</sup>C]-zapnometinib (30 mg/kg) to male and female rats (Group 1)

### Males

| Parameter                             | Concentration of radioactivity (µg equivalents/mL) |      |      |      |      |        |
|---------------------------------------|----------------------------------------------------|------|------|------|------|--------|
|                                       | 1M                                                 | 2M   | 3M   | Mean | SD   | CV (%) |
| C <sub>max</sub> (µg equiv./mL)       | 89.2                                               | 81.2 | 79.4 | 83.3 | 5.22 | 6.26   |
| T <sub>max</sub> (h)                  | 8.00                                               | 2.00 | 2.00 | 4.00 | 3.46 | 86.6   |
| AUC <sub>0-t</sub> (h*µg equiv./mL)   | 1530                                               | 1200 | 1020 | 1250 | 256  | 20.5   |
| AUC <sub>0-inf</sub> (h*µg equiv./mL) | 1530                                               | 1200 | 1030 | 1260 | 256  | 20.4   |
| t <sub>1/2</sub> (h)                  | 35.1                                               | 28.3 | 39.8 | 34.4 | 5.79 | 16.8   |

### Females

| Parameter                             | Concentration of radioactivity (µg equivalents/mL) |      |      |      |      |        |
|---------------------------------------|----------------------------------------------------|------|------|------|------|--------|
|                                       | 4F                                                 | 5F   | 6F   | Mean | SD   | CV (%) |
| C <sub>max</sub> (µg equiv./mL)       | 130                                                | 107  | 130  | 122  | 13.3 | 10.9   |
| T <sub>max</sub> (h)                  | 2.00                                               | 2.00 | 4.00 | 2.67 | 1.15 | 43.3   |
| AUC <sub>0-t</sub> (h*µg equiv./mL)   | 1830                                               | 1540 | 1940 | 1770 | 205  | 11.6   |
| AUC <sub>0-inf</sub> (h*µg equiv./mL) | 1830                                               | 1540 | 1940 | 1770 | 205  | 11.6   |
| t <sub>1/2</sub> (h)                  | 37.2                                               | 36.0 | 23.4 | 32.2 | 7.66 | 23.8   |

SD Standard deviation, CV Coefficient of variance

**Supplementary Table S2:** Amounts (% Dose) of the principal components separated by HPLC in pooled urine following a single oral administration of [<sup>14</sup>C]-zapnometinib (30 mg/kg) to male rats

| Radioactive component | Retention time (minutes) | % Dose      |              |               | Total (0 – 48 hours) |
|-----------------------|--------------------------|-------------|--------------|---------------|----------------------|
|                       |                          | 0 – 6 hours | 6 – 24 hours | 24 – 48 hours |                      |
| U1                    | 2.5                      | 0.01        | 0.05         | <0.01         | 0.06                 |
| U2                    | 3.0                      | 0.03        | 0.20         | 0.01          | 0.24                 |
| U3                    | 4.0                      | <0.01       | 0.03         | ND            | 0.03                 |
| U4                    | 7.0                      | <0.01       | 0.04         | ND            | 0.04                 |
| U5                    | 16.5                     | <0.01       | 0.02         | ND            | 0.02                 |
| U6                    | 17.5                     | 0.01        | 0.04         | 0.01          | 0.06                 |
| U7                    | 18.0                     | 0.01        | 0.05         | 0.01          | 0.07                 |
| U8                    | 19.0                     | 0.01        | ND           | ND            | 0.01                 |
| U9                    | 20.0                     | 0.01        | 0.07         | 0.04          | 0.12                 |
| U10                   | 20.5                     | 0.01        | 0.10         | ND            | 0.11                 |
| U11                   | 21.0                     | 0.03        | 0.07         | 0.01          | 0.11                 |
| U12                   | 22.0                     | <0.01       | ND           | <0.01         | <0.01                |
| U13                   | 22.5                     | <0.01       | ND           | ND            | <0.01                |
| U14                   | 23.5                     | 0.01        | 0.34         | <0.01         | 0.35                 |
| U15                   | 24.5                     | 0.01        | ND           | 0.09          | 0.10                 |
| U16                   | 25.0                     | 0.02        | 0.21         | 0.21          | 0.44                 |
| U17                   | 26.5                     | ND          | 0.02         | ND            | 0.02                 |
| U18                   | 28.5                     | <0.01       | ND           | ND            | <0.01                |
| U19                   | 29.5                     | 0.01        | 0.20         | ND            | 0.21                 |
| U20                   | 31.0                     | ND          | 0.03         | 0.02          | 0.05                 |
| U21                   | 32.5                     | 0.02        | 0.20         | 0.03          | 0.25                 |
| U22                   | 34.0                     | 0.01        | ND           | ND            | 0.01                 |
| U23                   | 36.0                     | <0.01       | 0.02         | ND            | 0.02                 |
| U24                   | 37.0                     | ND          | ND           | ND            | <0.01                |
| U25                   | 38.0                     | ND          | 0.05         | 0.01          | 0.06                 |
| U26                   | 39.0                     | ND          | ND           | ND            | ND                   |
| M1                    | 40.0                     | ND          | 0.02         | ND            | 0.02                 |
| U28                   | 46.0                     | ND          | 0.02         | ND            | 0.02                 |
| ATR-002               | 49.2                     | <0.01       | ND           | ND            | <0.01                |
| Remainder             |                          | 0.02        | 0.18         | 0.03          | 0.23                 |
| Total                 |                          | 0.22        | 1.96         | 0.47          | 2.65                 |

ND, Not detected

Remainder Accounts for areas on radiochromatogram which sum above zero but contain no discrete area of radioactivity

**Supplementary Table S3:** Amounts (% Dose) of the principal components separated by HPLC in pooled urine following a single oral administration of [<sup>14</sup>C]-zapnometinib (30 mg/kg) to female rats

| Radioactive component | Retention time (minutes) | % Dose      |              |               |                      |
|-----------------------|--------------------------|-------------|--------------|---------------|----------------------|
|                       |                          | 0 – 6 hours | 6 – 24 hours | 24 – 48 hours | Total (0 – 48 hours) |
| U1                    | 2.5                      | 0.02        | 0.04         | ND            | 0.06                 |
| U2                    | 3.0                      | 0.06        | 0.23         | 0.05          | 0.34                 |
| U3                    | 4.0                      | ND          | ND           | ND            | ND                   |
| U4                    | 7.0                      | ND          | ND           | ND            | ND                   |
| U5                    | 16.5                     | ND          | ND           | 0.01          | 0.01                 |
| U6                    | 17.5                     | 0.01        | 0.04         | ND            | 0.05                 |
| U7                    | 18.0                     | 0.01        | 0.07         | 0.02          | 0.10                 |
| U8                    | 19.0                     | 0.02        | 0.04         | ND            | 0.06                 |
| U9                    | 20.0                     | 0.03        | ND           | ND            | 0.03                 |
| U10                   | 20.5                     | ND          | 0.14         | 0.04          | 0.18                 |
| U11                   | 21.0                     | ND          | 0.06         | 0.03          | 0.09                 |
| U12                   | 22.0                     | 0.04        | 0.09         | 0.02          | 0.15                 |
| U13                   | 22.5                     | 0.01        | 0.06         | ND            | 0.07                 |
| U14                   | 23.5                     | 0.01        | 0.14         | 0.05          | 0.20                 |
| U15                   | 24.5                     | 0.01        | 0.09         | 0.04          | 0.14                 |
| U16                   | 25.0                     | 0.01        | 0.16         | 0.15          | 0.32                 |
| U17                   | 26.5                     | ND          | ND           | 0.02          | 0.02                 |
| U18                   | 28.5                     | 0.01        | 0.04         | ND            | 0.05                 |
| U19                   | 29.5                     | ND          | ND           | ND            | ND                   |
| U20                   | 31.0                     | 0.03        | 0.19         | 0.02          | 0.24                 |
| U21                   | 32.5                     | 0.08        | 0.40         | 0.12          | 0.60                 |
| U22                   | 34.0                     | ND          | ND           | ND            | ND                   |
| U23                   | 36.0                     | 0.02        | 0.12         | 0.03          | 0.17                 |
| U24                   | 37.0                     | 0.02        | 0.10         | ND            | 0.12                 |
| U25                   | 38.0                     | ND          | 0.04         | ND            | 0.04                 |
| U26                   | 39.0                     | 0.04        | 0.15         | 0.02          | 0.21                 |
| M1                    | 40.0                     | 0.05        | 0.23         | 0.01          | 0.29                 |
| U28                   | 46.0                     | 0.01        | 0.03         | ND            | 0.04                 |
| ATR-002               | 49.2                     | 0.06        | 0.10         | 0.01          | 0.17                 |
| Remainder             |                          | 0.05        | 0.27         | 0.06          | 0.38                 |
| Total                 |                          | 0.60        | 2.83         | 0.70          | 4.13                 |

ND, Not detected

Remainder Accounts for areas on radiochromatogram which sum above zero but contain no discrete area of radioactivity

**Supplementary Table S4:** Amounts (% Dose) of the principal components separated by HPLC in pooled feces extracts following a single oral administration of [<sup>14</sup>C]-zapnometinib (30 mg/kg) to male rats (Group 2)

| Radioactive component | Retention time (minutes) | % Dose       |               |                      |
|-----------------------|--------------------------|--------------|---------------|----------------------|
|                       |                          | 0 – 24 hours | 24 – 48 hours | Total (0 – 48 hours) |
| F1                    | 36.0                     | ND           | 0.13          | 0.13                 |
| F2                    | 28.0                     | ND           | 0.21          | 0.21                 |
| F3                    | 39.0                     | 1.03         | 0.21          | 1.24                 |
| M1                    | 40.0                     | 1.59         | ND            | 1.59                 |
| M2                    | 46.0                     | 9.76         | 2.22          | 11.98                |
| M3                    | 49.0                     | 4.21         | ND            | 4.21                 |
| Zapnometinib          | 49.2                     | 19.28        | 2.15          | 21.48                |
| M4                    | 50.0                     | 3.73         | 1.49          | 5.22                 |
| M5                    | 51.0                     | 18.33        | 1.65          | 19.98                |
| M6                    | 52.0                     | 11.66        | 0.66          | 12.32                |
| M7                    | 52.5                     | 1.59         | 0.46          | 2.05                 |
| M8                    | 53.0                     | 4.36         | 0.34          | 4.70                 |
| Remainder             |                          | 2.54         | 0.48          | 3.02                 |
| Total                 |                          | 79.34        | 9.98          | 89.32                |

ND

Not detected

Remainder

Accounts for areas on radiochromatogram which sum above zero but contain no discrete area of radioactivity

**Supplementary Table S5:** Amounts (% Dose) of the principal components separated by HPLC in pooled feces extracts following a single oral administration of [<sup>14</sup>C]-zapnometinib (30 mg/kg) to female rats (Group 2)

| Radioactive component | Retention time (minutes) | % Dose       |               |                      |
|-----------------------|--------------------------|--------------|---------------|----------------------|
|                       |                          | 0 – 24 hours | 24 – 48 hours | Total (0 – 48 hours) |
| F1                    | 36.0                     | 0.69         | 0.44          | 1.13                 |
| F2                    | 28.0                     | 0.75         | 0.33          | 1.08                 |
| F3                    | 39.0                     | ND           | ND            | ND                   |
| M1                    | 40.0                     | 1.10         | 0.27          | 1.37                 |
| M2                    | 46.0                     | 9.32         | 6.32          | 15.64                |
| M3                    | 49.0                     | 16.10        | 2.48          | 18.58                |
| Zapnometinib          | 49.2                     | 19.87        | 6.30          | 26.17                |
| M4                    | 50.0                     | 3.22         | 2.08          | 5.30                 |
| M5                    | 51.0                     | 3.84         | 1.35          | 5.19                 |
| M6                    | 52.0                     | 3.70         | 0.38          | 4.08                 |
| M7                    | 52.5                     | 4.11         | 1.15          | 5.26                 |
| M8                    | 53.0                     | 2.06         | 0.69          | 2.75                 |
| Remainder             |                          | 3.75         | 0.32          | 4.07                 |
| Total                 |                          | 68.51        | 22.11         | 90.62                |

ND

Not detected

Remainder

Accounts for areas on radiochromatogram which sum above zero but contain no discrete area of radioactivity

**Supplementary Table S6:** Concentrations and proportions of the principal components separated by HPLC in extracts of plasma in male rats

| Radioactive component | Retention time (minutes) | µg equivalents zapnometinib/g (% sample) |             |              |
|-----------------------|--------------------------|------------------------------------------|-------------|--------------|
|                       |                          | 2 hours                                  | 8 hours     | 168 hours    |
| P1                    | 3.0                      | ND                                       | ND          | 0.043 (68.8) |
| P2                    | 33.0                     | ND                                       | 0.779 (1.0) | 0.018 (29.5) |
| P3                    | 46.0                     | 1.26 (1.8)                               | 1.87 (2.4)  | ND           |
| zapnometinib          | 49.2                     | 64.4 (92.0)                              | 72.1 (92.5) | ND           |
| P4                    | 52.0                     | 0.980 (1.4)                              | 0.779 (1.0) | ND           |
| Remainder             |                          | 3.36 (4.8)                               | 2.42 (3.1)  | 0.001 (1.7)  |
| Total                 |                          | 70.0 (100)                               | 77.9 (100)  | 0.062 (100)  |

ND

Not detected

Remainder

Accounts for areas on radiochromatogram which sum above zero but contain no discrete area of radioactivity

**Supplementary Table S7:** Concentrations and proportions of the principal components separated by HPLC in extracts of plasma in female rats

| Radioactive component | Retention time (minutes) | µg equivalents zapnometinib/g (% sample) |             |              |
|-----------------------|--------------------------|------------------------------------------|-------------|--------------|
|                       |                          | 2 hours                                  | 8 hours     | 168 hours    |
| P1                    | 3.0                      | ND                                       | ND          | 0.632 (51.0) |
| P2                    | 33.0                     | ND                                       | 0.91 (1.0)  | ND           |
| P3                    | 46.0                     | 1.20 (1.5)                               | 2.18 (2.4)  | ND           |
| zapnometinib          | 49.2                     | 78.4 (97.9)                              | 80.7 (88.7) | ND           |
| P4                    | 52.0                     | ND                                       | 0.637 (0.7) | ND           |
| Remainder             |                          | 0.481 (0.6)                              | 6.55 (7.2)  | 0.608 (49.0) |
| Total                 |                          | 80.1 (100)                               | 91.0 (100)  | 1.24 (100)   |

ND

Not detected

Remainder

Accounts for areas on radiochromatogram which sum above zero but contain no discrete area of radioactivity

**Supplementary Table S8:** Cumulative excretion of radioactivity following a single oral administration of [<sup>14</sup>C]-zapnometinib (30 mg/kg) to male rats (Group 2)

| Sample and collection period (h) | % administered dose |       |       |       |      |
|----------------------------------|---------------------|-------|-------|-------|------|
|                                  | 7M                  | 8M    | 9M    | Mean  | SD   |
| Urine                            |                     |       |       |       |      |
| 0 – 6                            | 0.23                | 0.16  | 0.30  | 0.23  | 0.07 |
| 0 – 24                           | 2.69                | 1.99  | 1.92  | 2.20  | 0.43 |
| 0 – 48                           | 3.13                | 2.48  | 2.43  | 2.68  | 0.39 |
| 0 – 72                           | 3.20                | 2.55  | 2.56  | 2.77  | 0.37 |
| 0 – 96                           | 3.22                | 2.58  | 2.61  | 2.80  | 0.36 |
| 0 – 120                          | 3.23                | 2.59  | 2.63  | 2.82  | 0.36 |
| 0 – 144                          | 3.24                | 2.60  | 2.64  | 2.83  | 0.36 |
| 0 – 168                          | 3.24                | 2.60  | 2.65  | 2.83  | 0.36 |
| Faeces                           |                     |       |       |       |      |
| 0 – 24                           | 81.33               | 77.94 | 78.75 | 79.34 | 1.77 |
| 0 – 48                           | 90.61               | 88.87 | 88.48 | 89.32 | 1.13 |
| 0 – 72                           | 91.30               | 89.52 | 89.53 | 90.12 | 1.02 |
| 0 – 96                           | 91.37               | 89.65 | 89.82 | 90.28 | 0.95 |
| 0 – 120                          | 91.41               | 89.69 | 89.92 | 90.34 | 0.93 |
| 0 – 144                          | 91.44               | 89.72 | 89.96 | 90.37 | 0.93 |
| 0 – 168                          | 91.46               | 89.89 | 89.99 | 90.45 | 0.88 |
| Cage wash                        |                     |       |       |       |      |
| 0 – 24                           | 0.14                | 0.16  | 0.11  | 0.14  | 0.03 |
| 0 – 48                           | 0.22                | 0.19  | 0.14  | 0.18  | 0.04 |
| 0 – 72                           | 0.23                | 0.20  | 0.15  | 0.19  | 0.04 |
| 0 – 96                           | 0.23                | 0.24  | 0.16  | 0.21  | 0.04 |
| 0 – 120                          | 0.23                | 0.24  | 0.16  | 0.21  | 0.04 |
| 0 – 144                          | 0.23                | 0.24  | 0.16  | 0.21  | 0.04 |
| 0 – 168                          | 0.23                | 0.26  | 0.17  | 0.22  | 0.05 |
| Expired air                      |                     |       |       |       |      |
| 0 – 24                           | 0.02                | 0.02  | 0.02  | 0.02  | 0.00 |
| 0 – 48                           | 0.02                | 0.02  | 0.02  | 0.02  | 0.00 |
| 0 – 72                           | 0.02                | 0.02  | 0.02  | 0.02  | 0.00 |

SD Standard deviation

**Supplementary Table S9:** Cumulative excretion of radioactivity following a single oral administration of [<sup>14</sup>C]-zapnometinib (30 mg/kg) to female rats (Group 2)

| Sample and collection period (h) | % administered dose |       |       |       |      |
|----------------------------------|---------------------|-------|-------|-------|------|
|                                  | 10F                 | 11F   | 12F   | Mean  | SD   |
| Urine                            |                     |       |       |       |      |
| 0 – 6                            | 0.44                | 0.35  | 0.28  | 0.36  | 0.08 |
| 0 – 24                           | 3.09                | 3.03  | 3.50  | 3.21  | 0.26 |
| 0 – 48                           | 3.79                | 3.70  | 4.26  | 3.92  | 0.30 |
| 0 – 72                           | 3.96                | 3.81  | 4.37  | 4.05  | 0.29 |
| 0 – 96                           | 4.00                | 3.84  | 4.41  | 4.08  | 0.29 |
| 0 – 120                          | 4.02                | 3.86  | 4.43  | 4.10  | 0.29 |
| 0 – 144                          | 4.03                | 3.87  | 4.44  | 4.11  | 0.29 |
| 0 – 168                          | 4.04                | 3.88  | 4.45  | 4.12  | 0.29 |
| Faeces                           |                     |       |       |       |      |
| 0 – 24                           | 68.79               | 74.70 | 62.03 | 68.51 | 6.34 |
| 0 – 48                           | 90.11               | 96.59 | 85.16 | 90.62 | 5.73 |
| 0 – 72                           | 96.05               | 97.23 | 85.96 | 93.08 | 6.19 |
| 0 – 96                           | 96.19               | 97.39 | 86.06 | 93.21 | 6.22 |
| 0 – 120                          | 96.25               | 97.44 | 86.10 | 93.26 | 6.23 |
| 0 – 144                          | 96.29               | 97.47 | 86.13 | 93.30 | 6.23 |
| 0 – 168                          | 96.32               | 97.49 | 86.15 | 93.32 | 6.24 |
| Cage wash                        |                     |       |       |       |      |
| 0 – 24                           | 0.39                | 0.21  | 0.35  | 0.32  | 0.09 |
| 0 – 48                           | 0.48                | 0.37  | 0.42  | 0.42  | 0.06 |
| 0 – 72                           | 0.50                | 0.39  | 0.44  | 0.44  | 0.06 |
| 0 – 96                           | 0.51                | 0.40  | 0.45  | 0.45  | 0.06 |
| 0 – 120                          | 0.52                | 0.40  | 0.45  | 0.46  | 0.06 |
| 0 – 144                          | 0.53                | 0.40  | 0.46  | 0.46  | 0.07 |
| 0 – 168                          | 0.85                | 0.42  | 0.53  | 0.60  | 0.22 |
| Expired air                      |                     |       |       |       |      |
| 0 – 24                           | 0.02                | 0.02  | 0.02  | 0.02  | 0.00 |
| 0 – 48                           | 0.02                | 0.02  | 0.02  | 0.02  | 0.00 |
| 0 – 72                           | 0.02                | 0.02  | 0.02  | 0.02  | 0.00 |

SD Standard deviation

BLQ Below the limit of quantification (<2 × background radioactivity)



**Supplementary Table S10:** Concentrations of radioactivity in tissues determined by QWBA following a single oral administration of [<sup>14</sup>C]- zapnometinib (30 mg/kg) to male albino rats (Group 4)

| Tissue type             | Tissue/organ                 | Concentrations of total radioactivity (µg equivalents Zapnometinib/g) |             |             |              |
|-------------------------|------------------------------|-----------------------------------------------------------------------|-------------|-------------|--------------|
|                         |                              | 27M<br>2 h                                                            | 28M<br>24 h | 29M<br>72 h | 30M<br>168 h |
| Non QWBA                | Plasma <sup>a</sup>          | <b>48.2</b>                                                           | 4.24        | 0.185       | 0.076        |
|                         | Blood cells <sup>b</sup>     | <b>6.00</b>                                                           | 0.314       | 0.050       | 0.042        |
| Circulatory             | Aorta                        | <b>67.2</b>                                                           | 3.94        | BLQ         | BLQ          |
|                         | Blood (cardiac)              | <b>96.8</b>                                                           | 8.11        | 0.555       | BLQ          |
|                         | Vena cava                    | <b>47.3</b>                                                           | 1.39        | 0.386       | BLQ          |
| Nervous                 | Brain                        | <b>3.12</b>                                                           | 0.297       | 0.370       | BLQ          |
|                         | Spinal cord                  | <b>4.20</b>                                                           | 0.264       | 0.306       | BLQ          |
| Ocular                  | Eye (whole)                  | <b>0.568</b>                                                          | 0.557       | BLQ         | BLQ          |
|                         | Uveal tract/retina           | <b>23.6</b>                                                           | 2.86        | BLQ         | BLQ          |
| Visceral                | Kidney cortex                | <b>67.3</b>                                                           | 7.87        | 0.916       | 0.406        |
|                         | Kidney medulla               | <b>37.0</b>                                                           | 4.31        | 0.456       | 0.257        |
|                         | Liver                        | <b>66.4</b>                                                           | 7.04        | 1.27        | 0.513        |
|                         | Lungs                        | <b>51.0</b>                                                           | 4.80        | 0.520       | BLQ          |
|                         | Myocardium                   | <b>46.2</b>                                                           | 2.49        | 0.276       | BLQ          |
|                         | Spleen                       | <b>15.9</b>                                                           | 1.26        | 0.338       | BLQ          |
| Glandular/<br>Secretory | Adrenal gland                | <b>33.0</b>                                                           | 3.80        | 0.490       | BLQ          |
|                         | Exorbital lacrimal gland     | <b>16.4</b>                                                           | 1.42        | 0.407       | BLQ          |
|                         | Harderian gland              | <b>19.4</b>                                                           | 3.39        | 0.582       | BLQ          |
|                         | Intra-orbital lacrimal gland | <b>70.5</b>                                                           | 3.83        | BLQ         | BLQ          |
|                         | Mesenteric lymph nodes       | <b>12.1</b>                                                           | 1.09        | BLQ         | BLQ          |
|                         | Nasal mucosa                 | <b>7.58</b>                                                           | 0.310       | 0.392       | BLQ          |
|                         | Nasal turbinates             | <b>12.9</b>                                                           | 1.22        | 0.454       | BLQ          |
|                         | Pancreas                     | <b>24.5</b>                                                           | 1.77        | BLQ         | BLQ          |
|                         | Pineal gland                 | <b>35.9</b>                                                           | 2.67        | 0.593       | BLQ          |
|                         | Pituitary                    | <b>40.9</b>                                                           | 1.87        | 0.448       | BLQ          |
|                         | Salivary gland               | <b>43.8</b>                                                           | 1.89        | BLQ         | BLQ          |
|                         | Thymus                       | <b>15.3</b>                                                           | 0.828       | BLQ         | BLQ          |
|                         | Thyroid                      | <b>35.0</b>                                                           | 2.04        | BLQ         | BLQ          |
| Musculo-skeletal        | Bone marrow                  | <b>14.9</b>                                                           | 1.29        | BLQ         | BLQ          |
|                         | Bone surface <sup>c</sup>    | <b>26.0</b>                                                           | 2.32        | 1.63        | BLQ          |
|                         | Fat (abdominal) <sup>c</sup> | <b>7.44</b>                                                           | 0.721       | 0.426       | BLQ          |
|                         | Fat (brown)                  | <b>33.8</b>                                                           | 1.64        | 0.451       | BLQ          |
|                         | Muscle                       | <b>15.6</b>                                                           | 0.735       | BLQ         | BLQ          |
|                         | Skin                         | <b>12.4</b>                                                           | 4.97        | 2.26        | 1.75         |
| Reproductive            | Epididymis                   | <b>15.6</b>                                                           | 2.42        | BLQ         | BLQ          |
|                         | Preputial gland              | <b>22.0</b>                                                           | 1.41        | BLQ         | BLQ          |
|                         | Prostate                     | <b>25.7</b>                                                           | 2.78        | BLQ         | BLQ          |
|                         | Seminal vesicles             | <b>8.02</b>                                                           | 0.771       | BLQ         | BLQ          |
|                         | Testis                       | <b>13.1</b>                                                           | 1.26        | BLQ         | BLQ          |
| Excretory               | Caecum wall                  | <b>22.1</b>                                                           | 3.10        | 0.474       | BLQ          |
|                         | Large intestine wall         | <b>29.9</b>                                                           | 6.10        | 0.591       | BLQ          |
|                         | Rectum wall                  | <b>19.6</b>                                                           | 8.09        | BLQ         | BLQ          |
|                         | Small intestine wall         | <b>32.4</b>                                                           | 4.02        | BLQ         | BLQ          |
|                         | Stomach wall                 | <b>25.1</b>                                                           | 1.24        | 0.322       | BLQ          |
| Urinary bladder wall    | <b>25.1</b>                  | 2.80                                                                  | BLQ         | BLQ         |              |

For all QWBA measurements:

Upper and lower limits of quantification = 510 and 0.118 µg equiv zapnometinib /g of tissue, respectively

QWBA Quantitative whole-body autoradiography

BLQ Tissue radioactivity concentration below the lower limit of quantification (LLOQ)

<sup>a</sup> Determined by direct liquid scintillation analysis (LLOQ = 0.007 – 0.013 µg equiv zapnometinib /g)

<sup>b</sup> Determined by oxidation and liquid scintillation analysis (LLOQ = 0.011 – 0.013 µg equiv zapnometinib /g)

<sup>c</sup> Tissue corrected for quenching

Values in bold represent maximum tissue concentrations (T<sub>max</sub>)
